# Supplementary material
Source: PubMed Central journal article supplement (PMC4015463)
Supplement: NIHMS530858-supplement-1.pdf [file NIHMS530858-supplement-1.pdf]

### Supplementary Figure S1

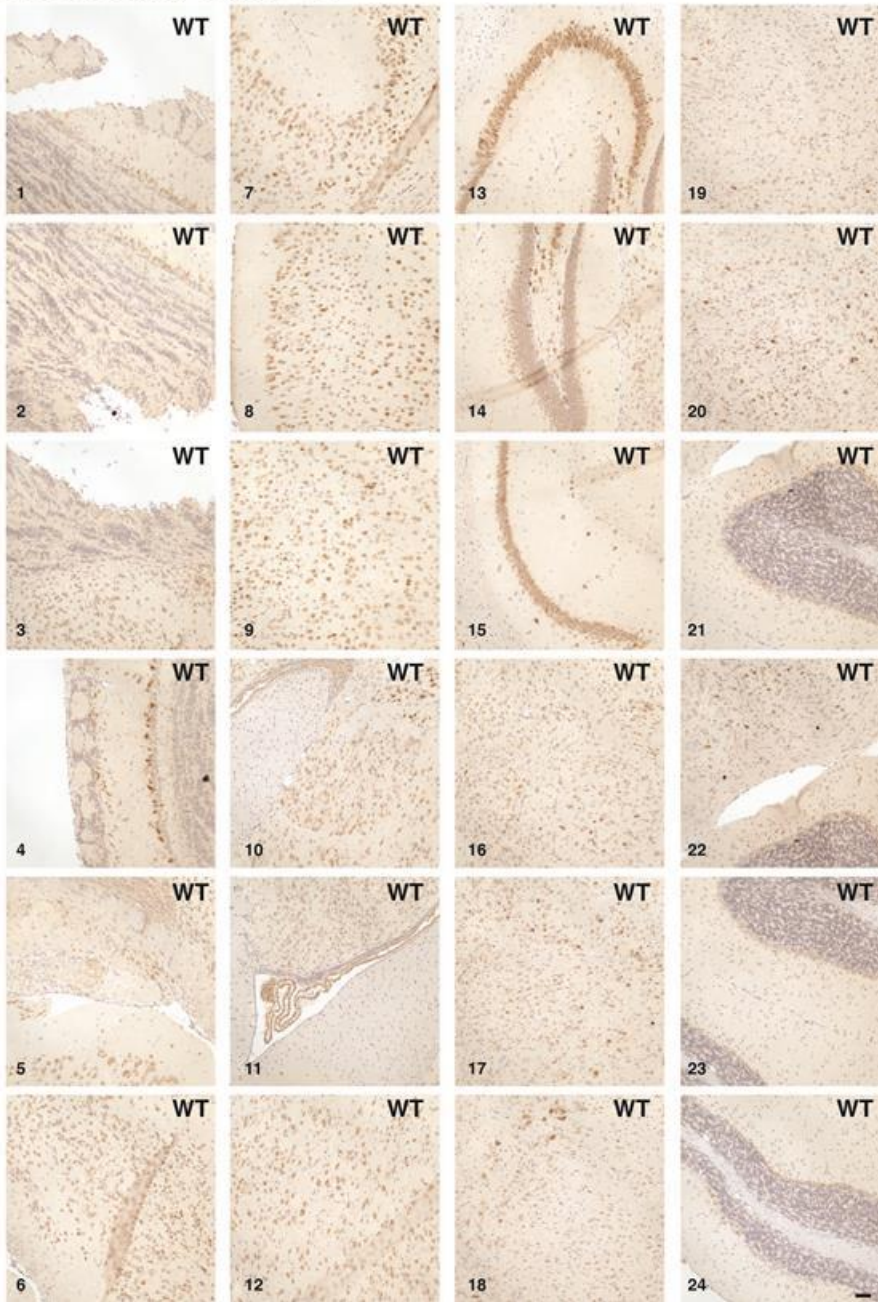

### Supplementary Figure S1. Neu1 expression in the wild-type (WT) mouse brain.

Representative images of WT brain sections stained with anti-Neu1 antibody. 1 to 24 from olfactory bulb to cerebellum. Mice used for histological analyses were 5 months of age. Scale bar 20 $\mu$ m.

## Supplementary Figure S2

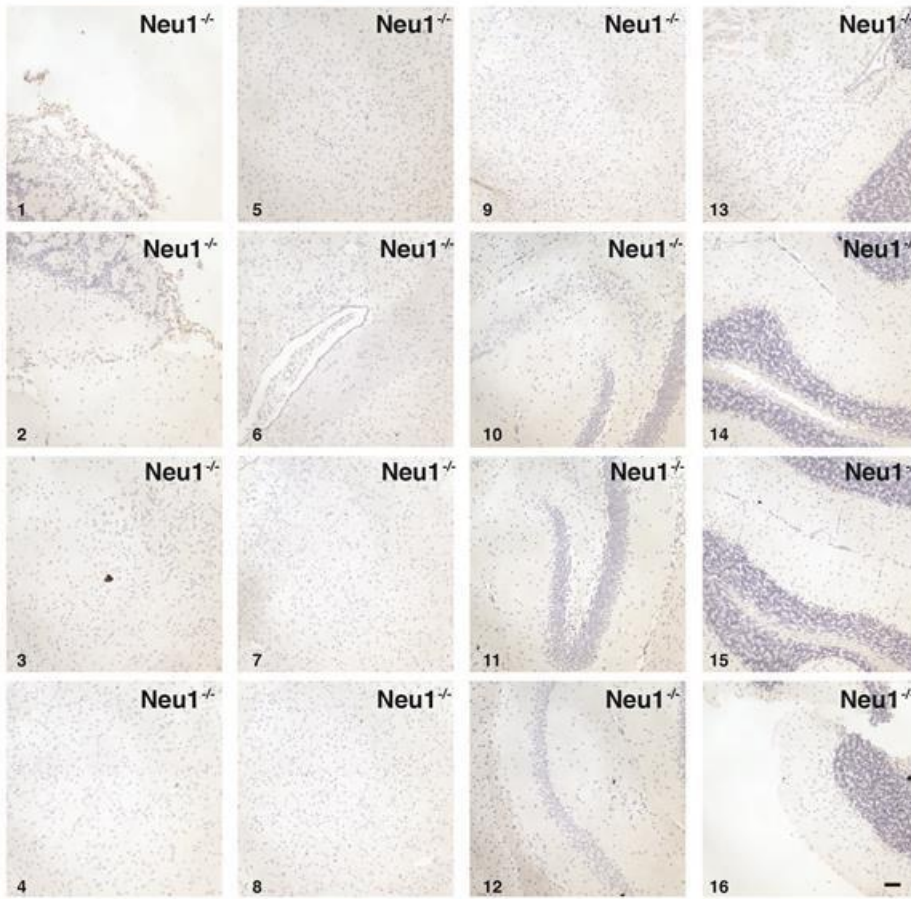

**Supplementary Figure S2. Neu1 expression in the *Neu1*<sup>-/-</sup> mouse brain.** *Neu1*<sup>-/-</sup> brain sections stained with anti-Neu1 antibody show no reactivity. 1 to 16 s from olfactory bulb to cerebellum. Mice used for histological analyses were 5 months of age. Scale bar 20 $\mu$ m.

### Supplementary Figure S3

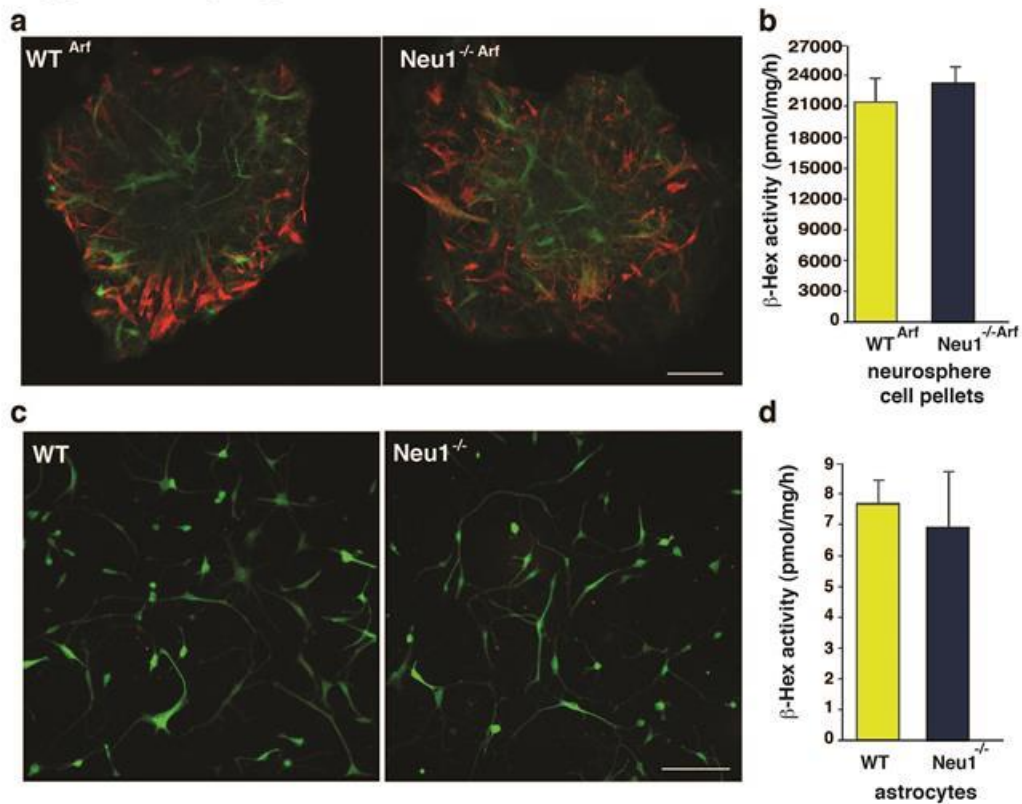

### Supplementary Figure S3. Extent of Lysosomal exocytosis in *Neu1*<sup>-/-</sup> neural cells.

**a**, Neurospheres were stained with markers of astrocytes (GFAP, red) and neurons ( $\beta$ -III tubulin, green). **b**, Similar amount of lysosomal exocytosis in *Neu1*<sup>-/-</sup> astrocytes and in WT astrocytes. Lysosomal exocytosis was measured as  $\beta$ -hex enzyme activity in the culture medium of primary astrocytes. **c**, Representative picture of WT<sup>Arf</sup> and *Neu1*<sup>-/-Arf</sup> hippocampal neurons stained with  $\beta$ -III tubulin (green) and GFAP (red). **d**, Similar extent of lysosomal exocytosis in *Neu1*<sup>-/-</sup> and in WT neurospheres cell pellets. Scale bar 100 $\mu$ m. Data are represented as mean  $\pm$  SD (error bars) of 3 independent experiments.

### Supplementary Figure S4

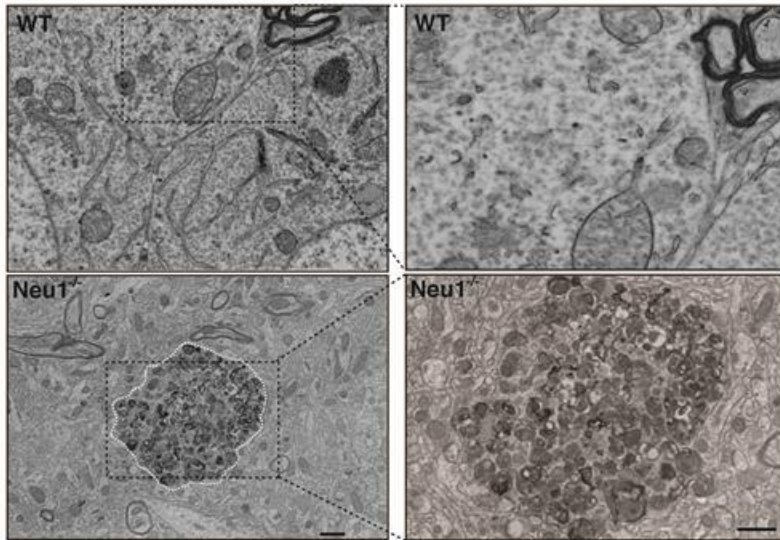

**Supplementary Figure S4. Dystrophic neurites in *Neu1*<sup>-/-</sup> brains.** Representative electron microscopic images of WT and *Neu1*<sup>-/-</sup> hippocampal specimens shows the presence of dystrophic neurites in the *Neu1*<sup>-/-</sup> hippocampal area. Right panels represent higher magnification of left panels. Mice used for these analyses were 5 months of age. Scale bar 500nm.

## Supplementary Figure S5

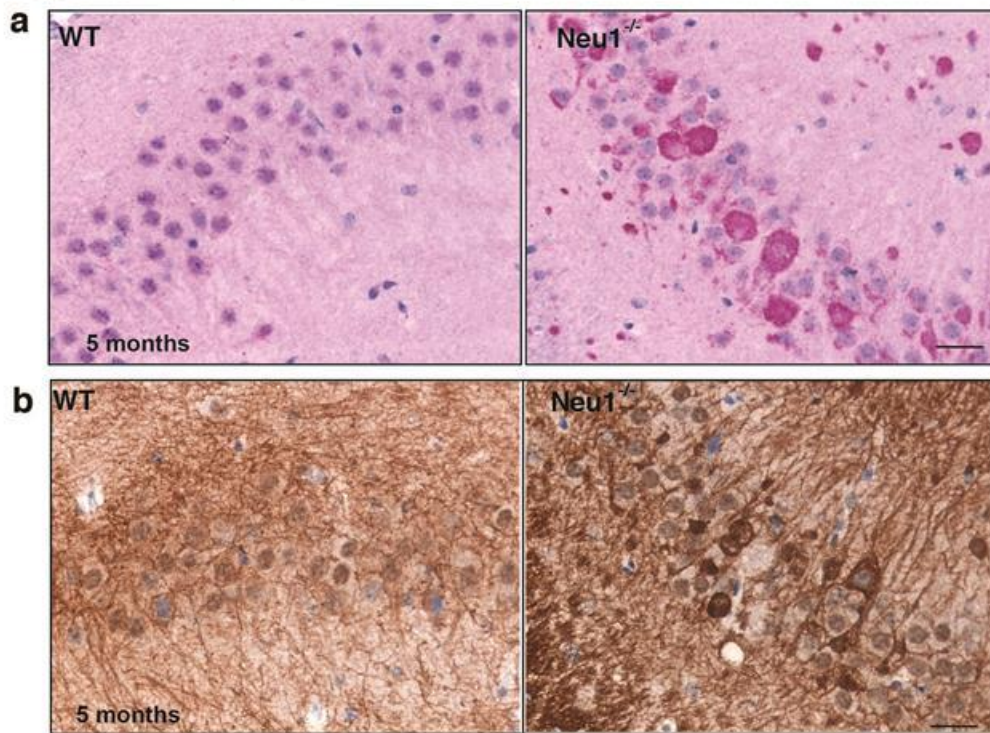

**Supplementary Figure S5. Loss of Neu1 results extensive cytoskeletal remodelling and impaired intracellular trafficking.** a, b Build-up of APP in older *Neu1*<sup>-/-</sup> brains was paralleled by the accumulation of ubiquitin (pink) and neurofilaments (brown) respectively. Mice used for these analyses were 5 months of age. Scale bar 20 $\mu$ m.

## Supplementary Figure S6

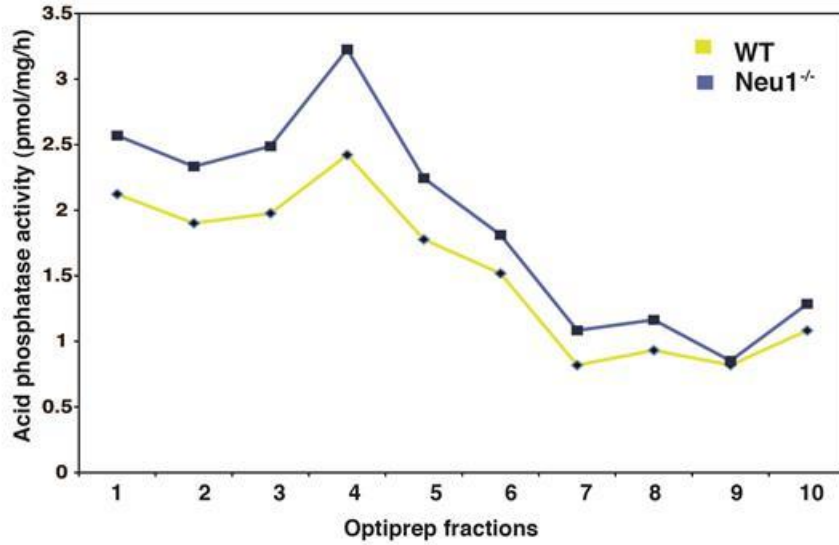

**Supplementary Figure S6. Acid phosphatase activity in lysosomal fractions.** WT and *Neu1*<sup>-/-</sup> lysosomal fractions obtained after an Optiprep density gradient were assayed for acid phosphatase activity. Mice used for these analyses were 5 months of age.

## Supplementary Figure S7

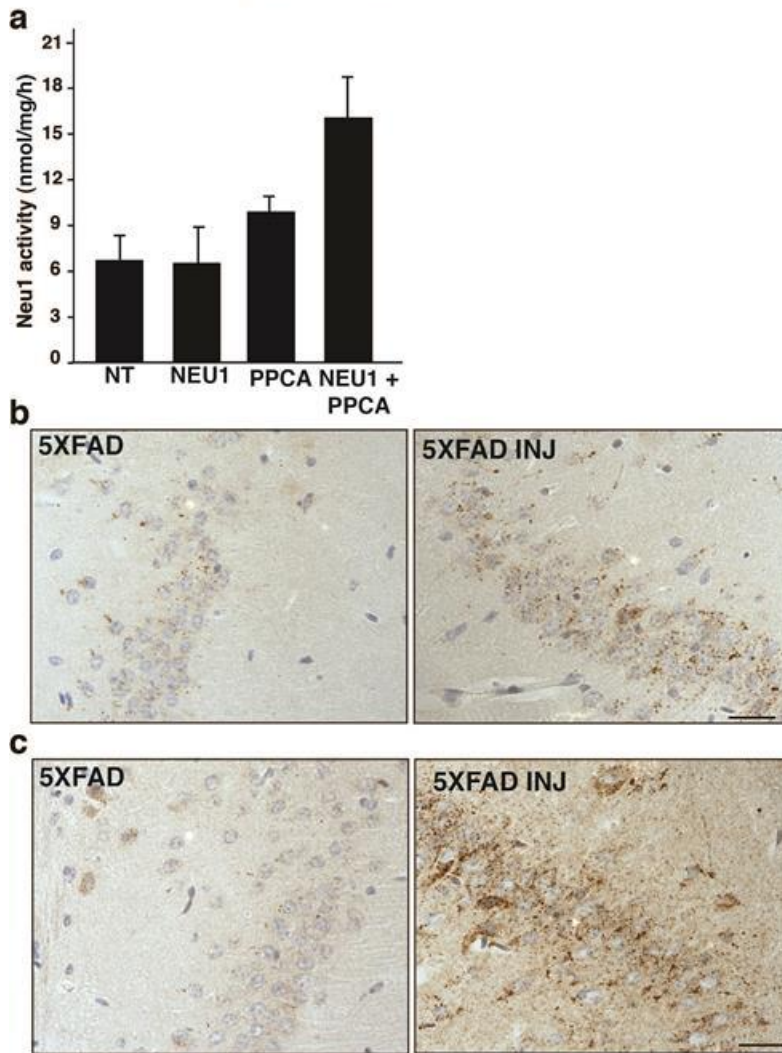

**Supplementary Figure S7. Upregulation of NEU1 and PPCA in 5XFAD mice injected with an adeno-associated virus containing human *NEU1* and *PPCA* (5XFAD INJ).** **a**, Neuro2a cells were transduced with adeno-associated virus containing human *NEU1*, *PPCA* (protective protein cathepsin A), or both. The highest Neu1 activity was achieved in the presence of both transgenes. Data are represented as mean  $\pm$  SD (error bars) of 3 independent experiments. **b and c**, 5XFAD mice were stereotactically injected with an admixture of AAVPPCA and AAVNEU1 and the levels of expression of NEU1 and PPCA were measured 4 weeks later. 5XFAD INJ mice expressed a higher level of NEU1 (**b**) and PPCA (**c**) than did 5XFAD animals injected only with carrier solution as demonstrated by immunohistochemistry analyses using anti-NEU1 and anti-PPCA antibodies. Scale bar 20µm.

# Supplementary Figure S8

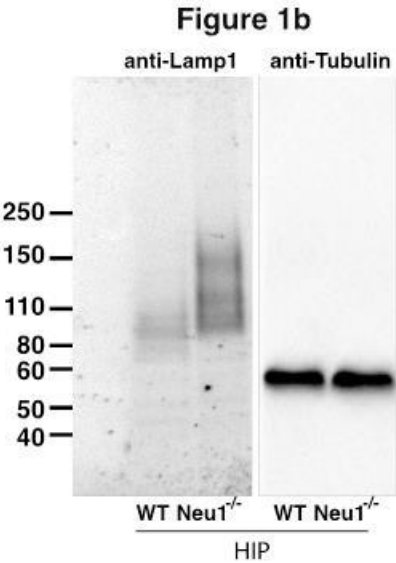

**Supplementary Figure S8.** Whole unaltered Western blots from Figure 1. Labelling is consistent with Figure 1.



## Supplementary Figure S9

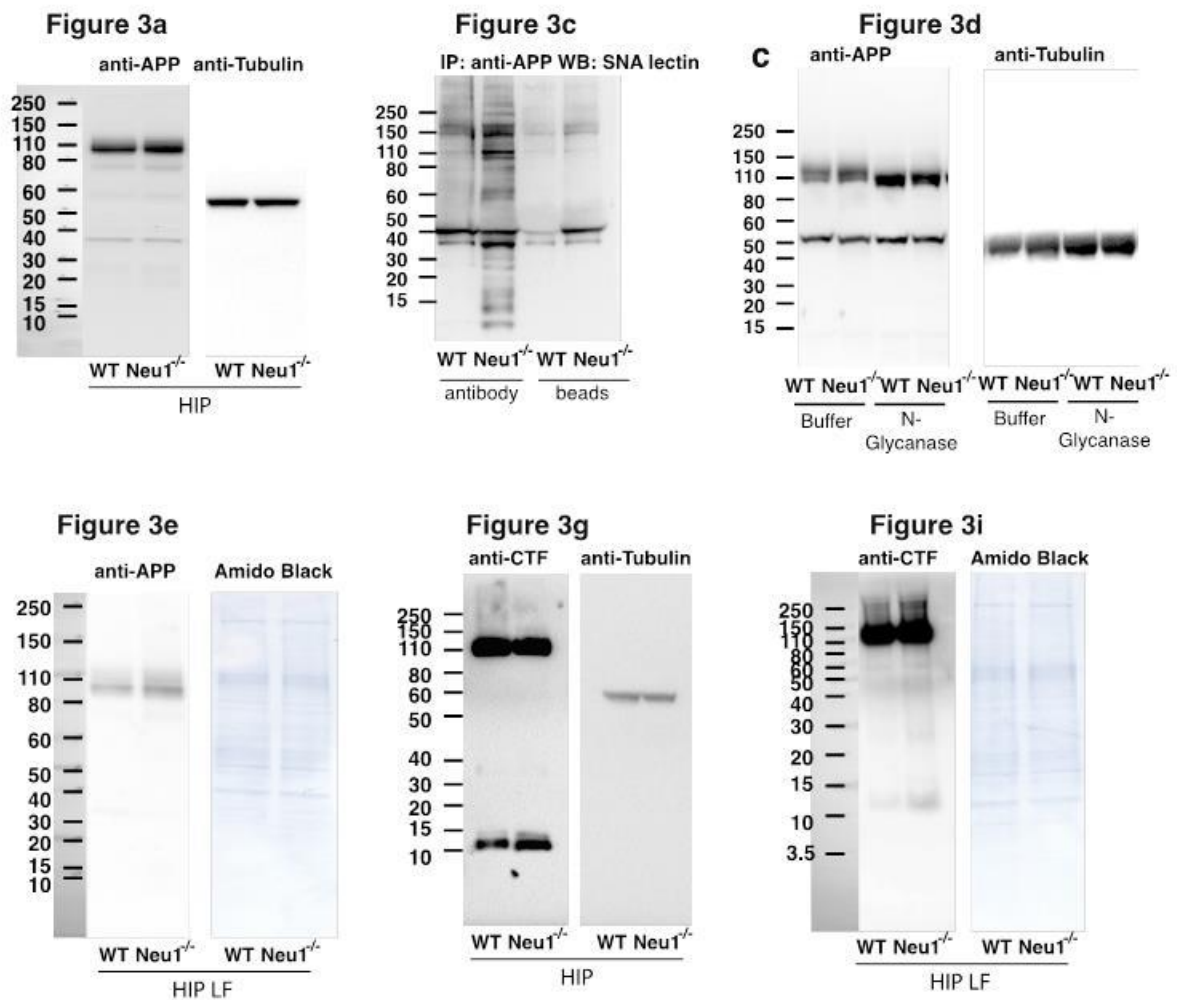

**Supplementary Figure S9.** Whole unaltered Western blots from Figure 3. Labelling is consistent with Figure 3.

## Supplementary Figure S10

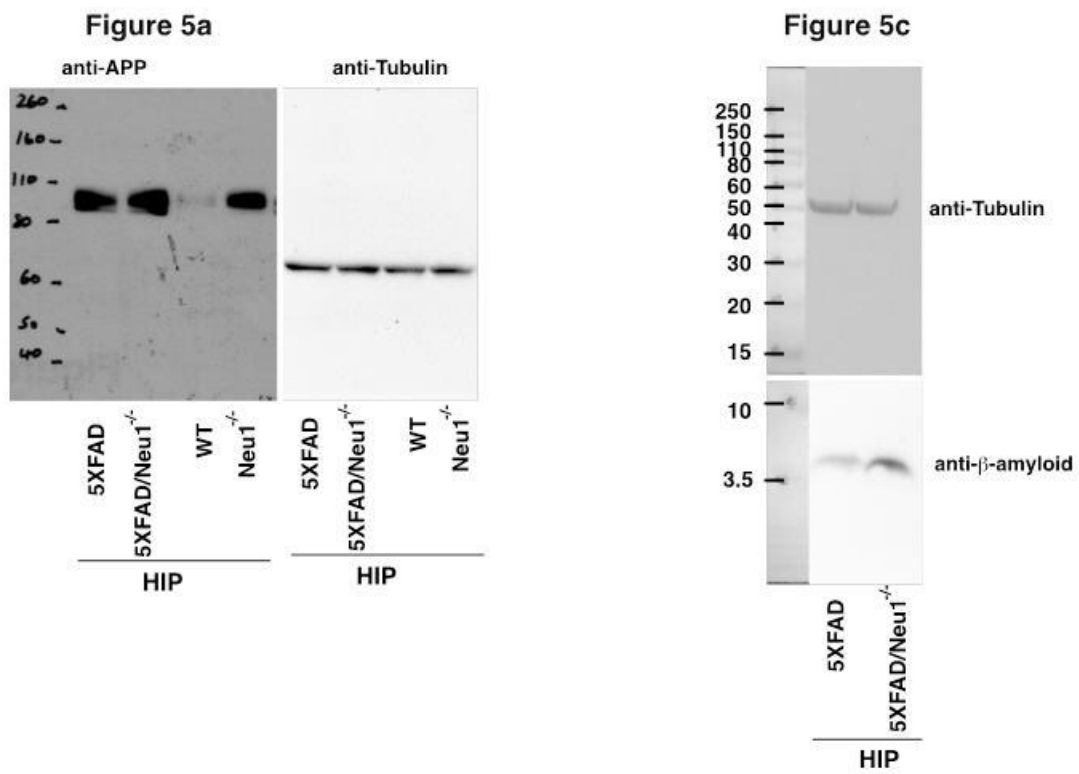

**Supplementary Figure S10.** Whole unaltered Western blots from Figure 5. Labelling is consistent with Figure 5.

# Supplementary Figure S11

## Figure 6d

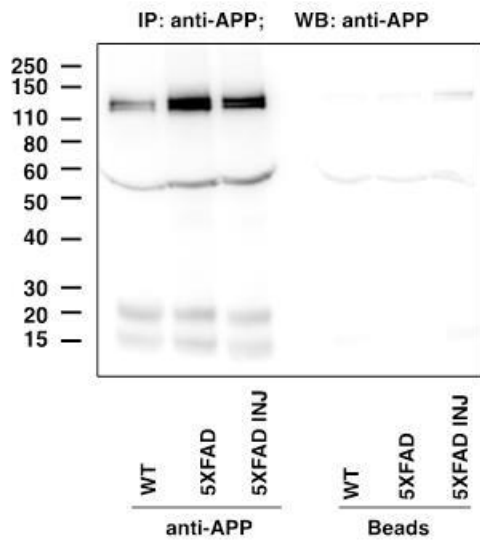

## Figure 6e

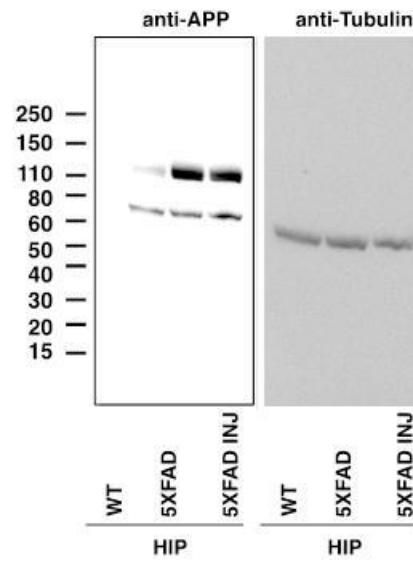

## Figure 6g

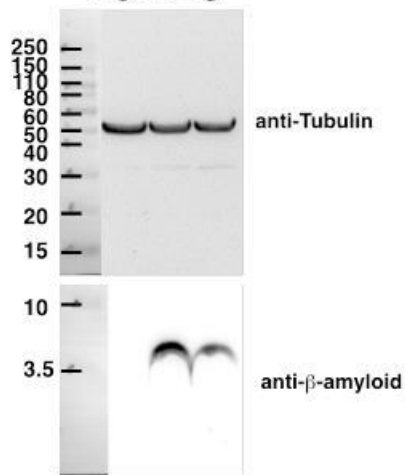

**Supplementary Figure S11.** Whole unaltered Western blots from Figure 6. Labelling is consistent with Figure 6
